# Supplementary material
Source: PubMed Central journal article supplement (PMC3174651)
Supplement: 1107450108_pnas.201107450SI.pdf [file 1107450108_pnas.201107450SI.pdf]

# Supporting Information

Currat and Excoffier 10.1073/pnas.1107450108

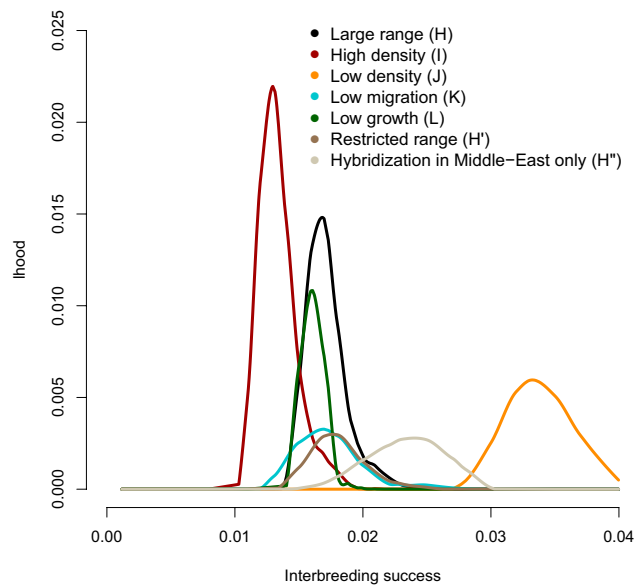

**Fig. S1.** Distribution of the proportion of simulations (among 10,000) resulting in Neanderthal introgression levels compatible with observations (1.9–3.1%) in French and Chinese samples. Each curve corresponds to a different demographic scenario (defined in Table S1) simulated assuming a deme area of  $50 \times 50 \text{ km}^2$ . Ihood, likelihood.

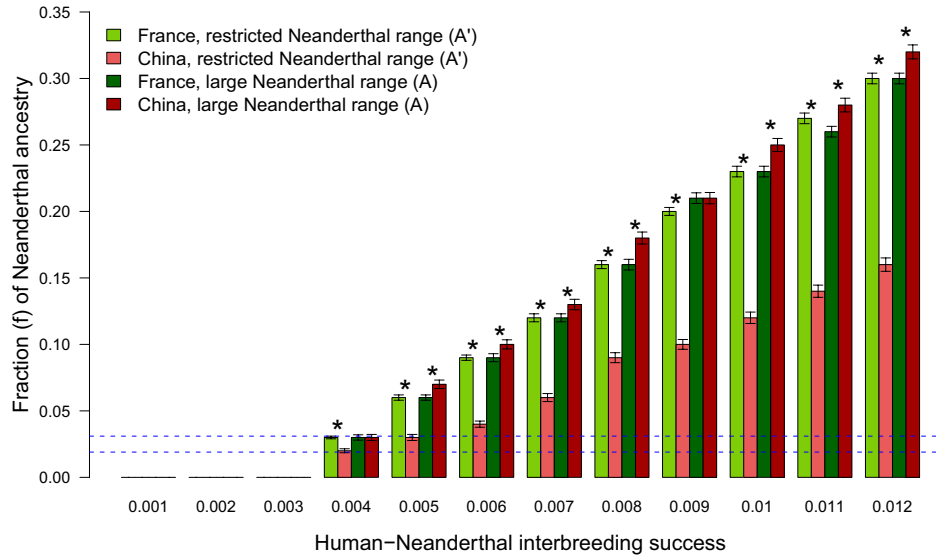

**Fig. S2.** Average fraction (introgression) of Neanderthal genes in present-day human populations sampled in France (green) and in China (red). Results are based on 10,000 simulations of the ancestry of 100 genes per population. The two light bars on the left are for results obtained under the restricted Neanderthal range (scenario A'), and the two dark bars on the right are for results obtained assuming a large Neanderthal range (scenario A, Fig. 1). Asterisks (\*) indicate significantly different Neanderthal ancestry in France and China ( $P < 5\%$ ,  $t$  test). The blue dashed lines delimit the assumed range of observed Neanderthal introgression in Eurasians (1.9–3.1%). The parameters used correspond to scenario A in Table 1.
